# Supplementary material for: Treatment Outcomes of Patients with Locally Advanced Synchronous Esophageal and Head/Neck Squamous Cell Carcinoma Receiving Curative Concurrent Chemoradiotherapy
Source: PubMed Central journal article supplement (PMC5278381; doi:10.1038/srep41785), 2017-01-30
Supplement: srep41785-s1.pdf [file srep41785-s1.pdf]

**Title: Treatment Outcomes of Patients with Locally Advanced Synchronous  
Esophageal and Head/Neck Squamous Cell Carcinoma Receiving Curative  
Concurrent Chemoradiotherapy**

Yen-Hao Chen, Hung-I Lu, Chih-Yen Chien, Chien-Ming Lo, Yu-Ming Wang, Shang-Yu Chou,

Yan-Ye Su, Li-Hsueh Shih, and Shau-Hsuan Li

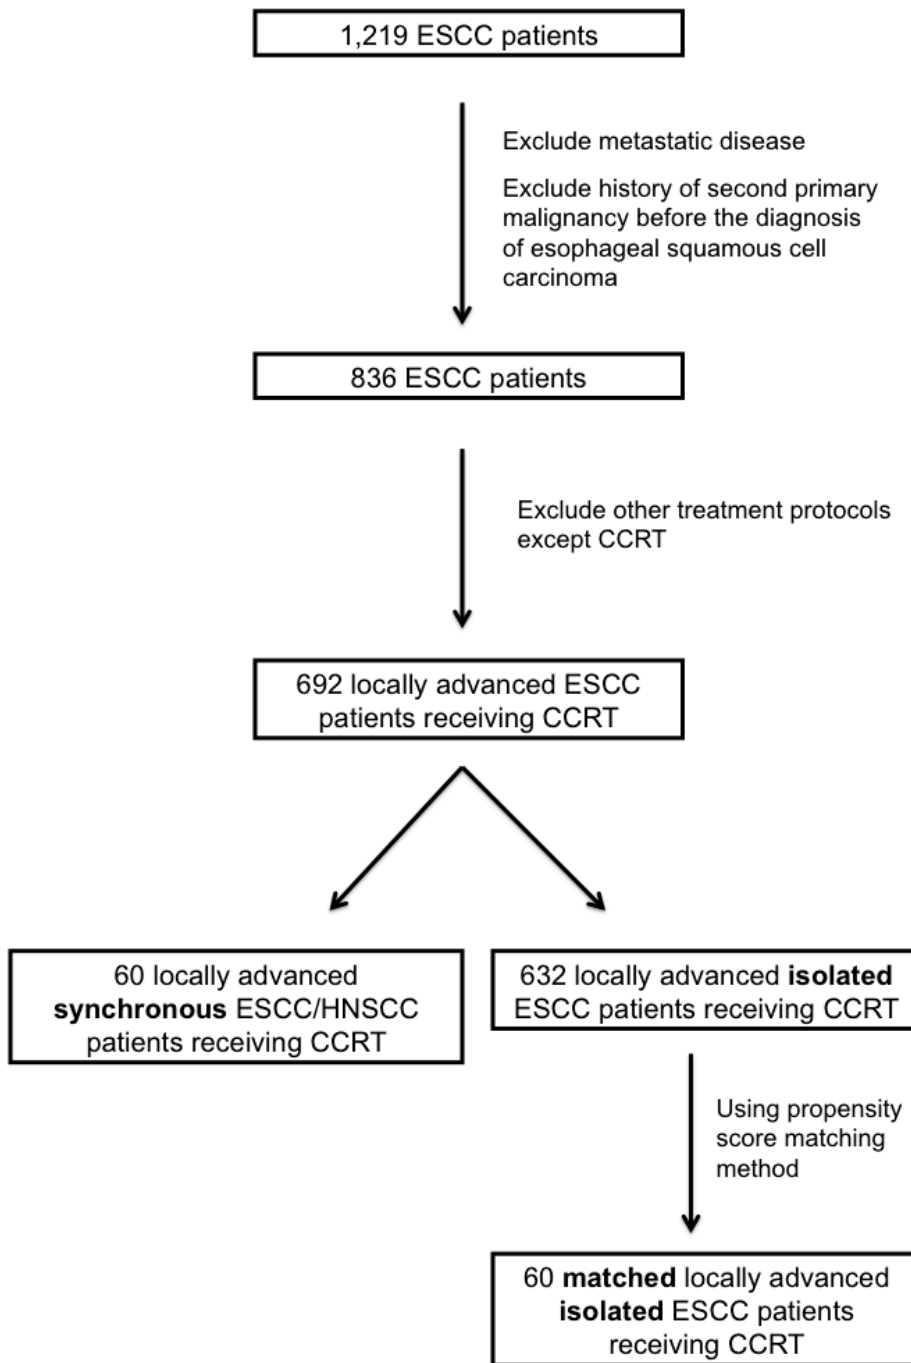

**Supplement Figure S1.** Algorithm for patients with locally advanced synchronous ESCC/HNSCC and patients with isolated ESCC. ESCC: esophageal squamous cell carcinoma; HNSCC: head and neck squamous cell carcinoma; CCRT: concurrent chemoradiotherapy.
